# Supplementary material for: Trimethylsulfonium lead triiodide (TMSPbI3) for moisture-stable perovskite solar cells
Source: Royal Society of Chemistry journal article supplement (doi:10.1039/d1se00560j), 2021-01-01
Supplement: d1se00560j1.pdf [file d1se00560j1.pdf]

## Supporting information

# Trimethylsulfonium Lead Triiodide (TMSPbI<sub>3</sub>) For Moisture-Stable Perovskite Solar Cells

Md. Mahbubur Rahman,<sup>a,†</sup> Arif Ahmed,<sup>b,†</sup> Chuang-ye Ge,<sup>c</sup> Ranbir Singh,<sup>c</sup> Kicheon Yoo,<sup>c</sup>  
Sanjay Sandhu,<sup>c</sup> Sunghwan Kim,<sup>b</sup> and Jae-Joon Lee<sup>c,\*</sup>

<sup>a</sup>*Department of Applied Chemistry, Konkuk University, Chungju 27478, Korea.*

<sup>b</sup>*Department of Chemistry, Kyungpook National University, Daegu 41566, Korea*

<sup>c</sup>*Department of Energy Materials Science and Engineering, Research Center for Photoenergy, Harvesting & Conversion Technology (phct), Dongguk University, Seoul 04620, Korea.*

\*To whom correspondence should be addressed. [jjlee@dongguk.edu](mailto:jjlee@dongguk.edu)

<sup>†</sup>Authors contributed equally to this work

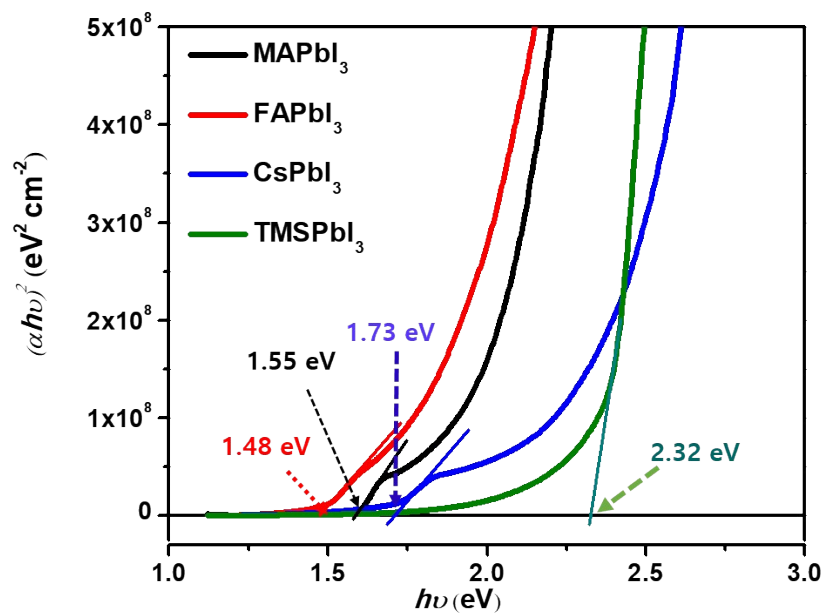

**Figure S1:** Tauc plots of TMSPbI<sub>3</sub>, MAPbI<sub>3</sub>, FAPbI<sub>3</sub>, and CsPbI<sub>3</sub> deposited on mesoporous TiO<sub>2</sub> electrodes.

## Calculation of absorption coefficient

The absorption coefficient ( $\alpha$ ) was obtained from:

$$\alpha = \left(\frac{1}{L}\right) \ln \frac{I_0}{I}$$

where,  $I$ ,  $I_0$  and  $L$  denotes the transmitted light intensity, incident light intensity, and sample thickness, respectively.

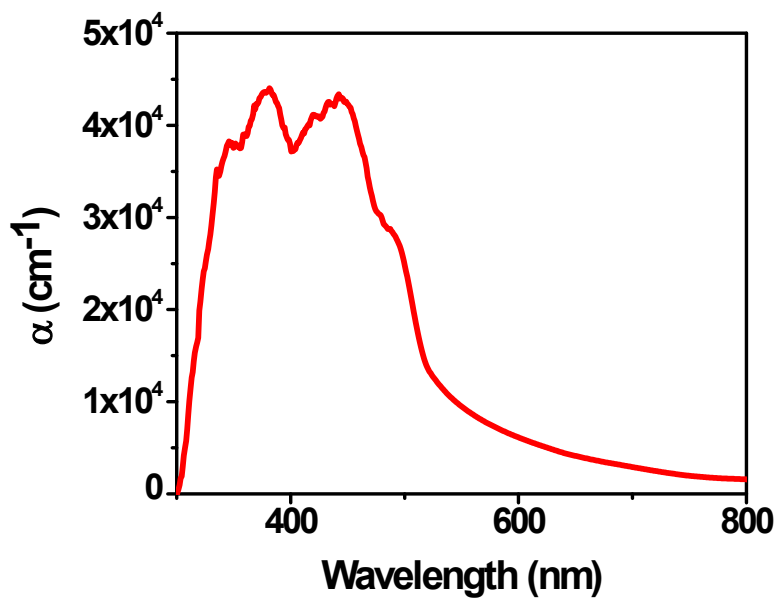

**Figure S2:** Plot of  $\alpha$  as a function of wavelength for  $\text{TMSPbI}_3$ .

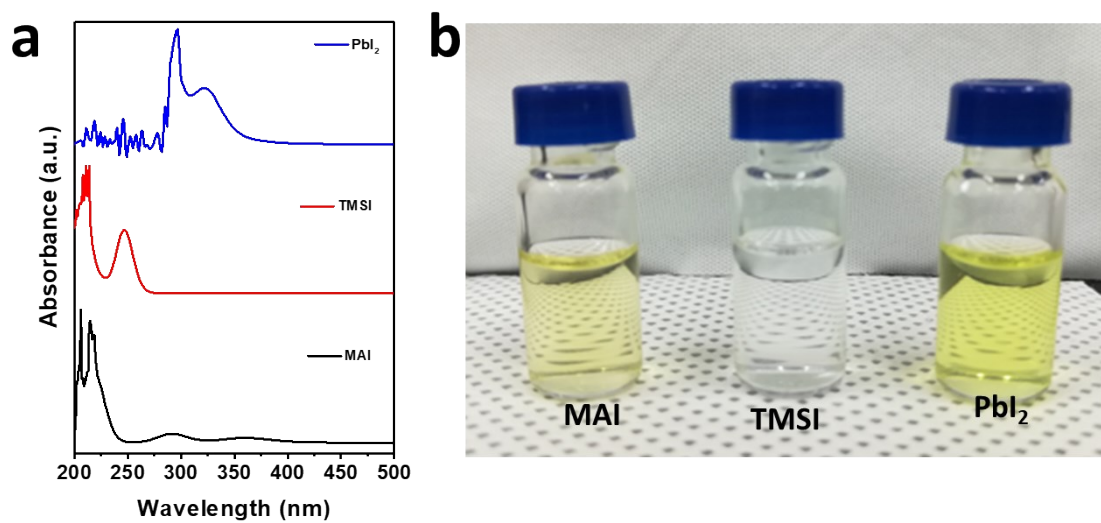

**Figure S3:** UV-Visible absorption spectra (a) and photographic images (b) of TMSI, MAI, and  $\text{PbI}_2$  solution in ethanol, acetonitrile, and dimethylformamide (DMF), respectively.

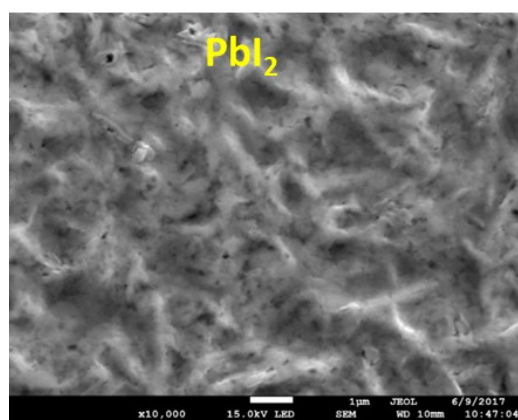

**Figure S4:** FE-SEM image of neat PbI<sub>2</sub> film after the first step of the deposition.

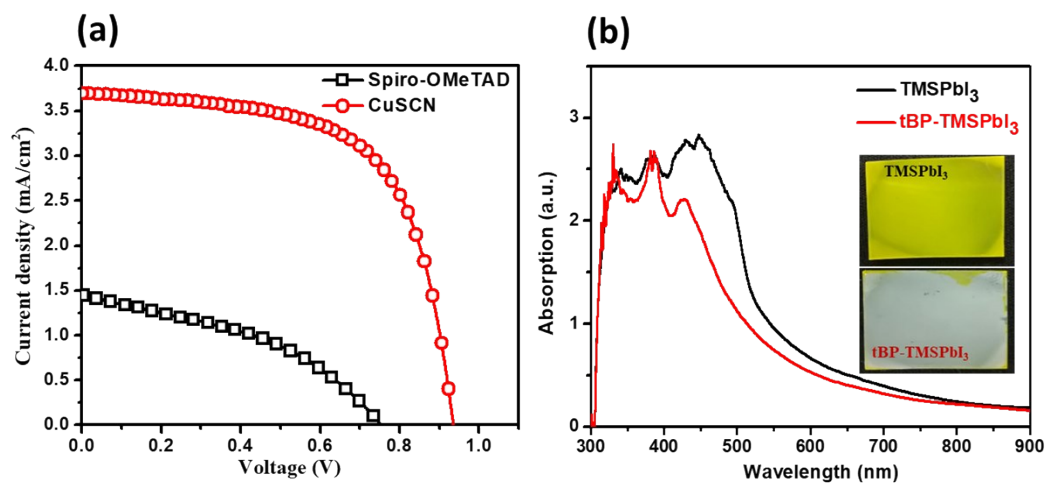

**Figure S5:** (a)  $J$ - $V$  characteristics of the TMSPbI<sub>3</sub> based PSCs fabricated using Spiro-MeOTAD and CuSCN-HTL layers. (b) Absorption spectra of TMSPbI<sub>3</sub> and tBP coated TMSPbI<sub>3</sub> films (inset shows the digital images of the as-fabricated perovskite films).

**Table S1.** PV parameters of the PSCs fabricated with different HTL (Spiro-MeOTAD and CuSCN) materials.

| HTL          | $V_{oc}$ (V) | $J_{sc}$ (mA cm <sup>-2</sup> ) | $FF$ (%) | $PCE$ (%) |
|--------------|--------------|---------------------------------|----------|-----------|
| CuSCN        | 0.936        | 3.698                           | 63.29    | 2.19      |
| Spiro-OMeTAD | 0.753        | 1.446                           | 40.24    | 0.438     |

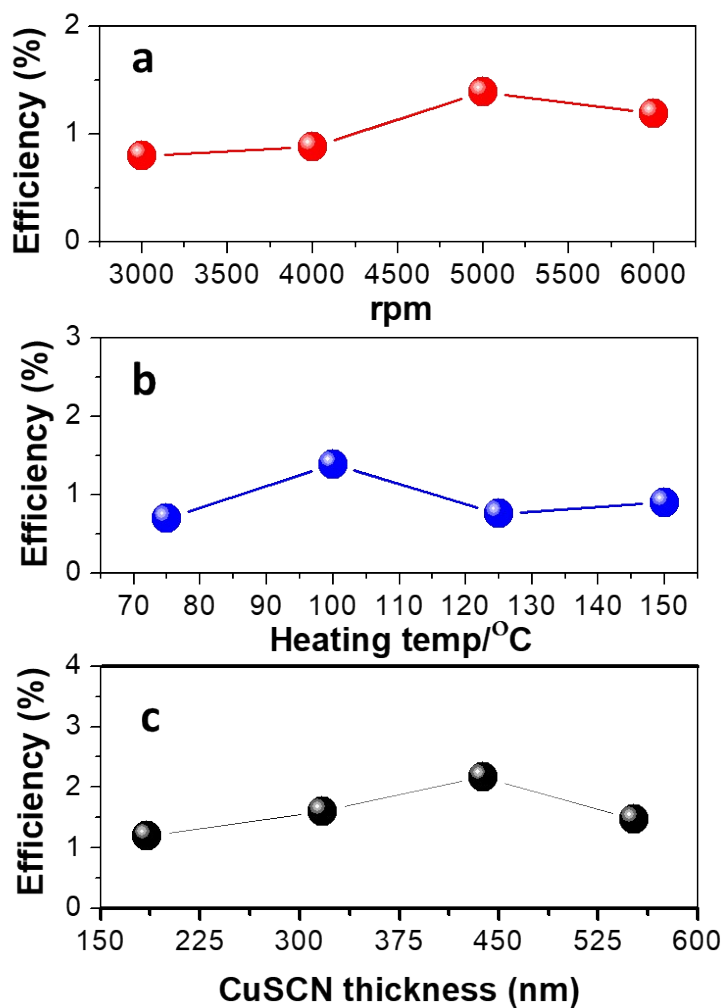

**Figure S6:** (a) Efficiency vs. rpm for  $\text{PbI}_2$  deposition on  $\text{TiO}_2$ , (b) efficiency vs. crystallization temperature of  $\text{TMSpBi}_3$ , and (c) efficiency vs. thickness of CuSCN-HTL layer.

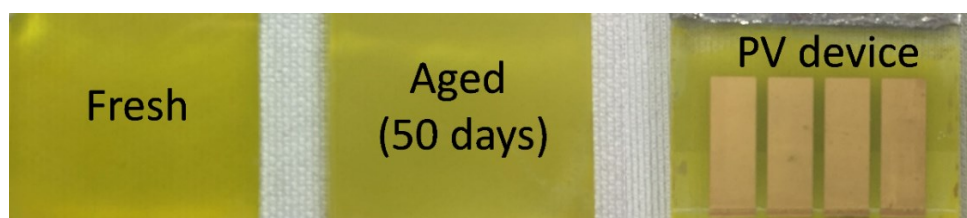

**Figure S7:** Digital images of a freshly prepared  $\text{TMSPbI}_3$  film, aged film, and PSC device.



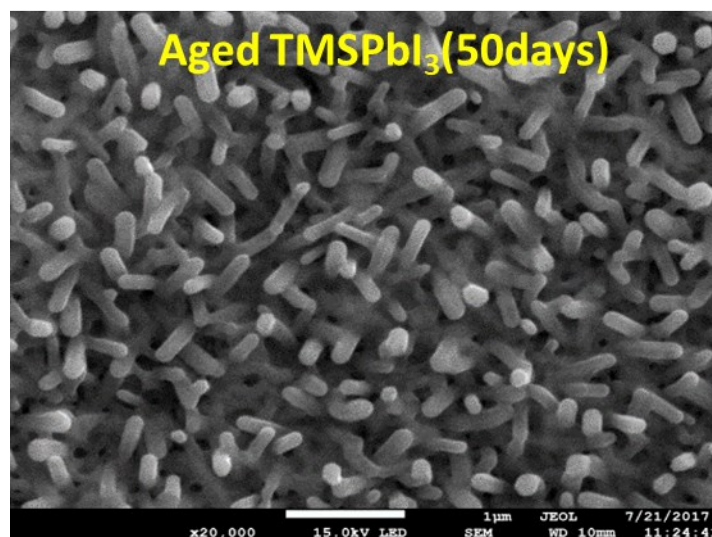

**Figure S8:** FE-SEM image of the aged perovskite film.

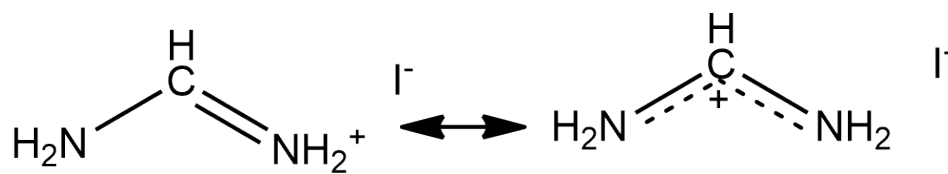

**Figure S9:** Resonance structure of FA<sup>+</sup> cation.
